# Supplementary material for: Structural basis for membrane attack complex inhibition by CD59
Source: PubMed Central journal article supplement (PMC9935631; doi:10.1038/s41467-023-36441-z), 2023-02-16
Supplement: 41467_2023_36441_MOESM1_ESM.pdf [file 41467_2023_36441_MOESM1_ESM.pdf]

## **Structural basis for membrane attack complex inhibition by CD59**

Emma C. Couves<sup>1</sup>, Scott Gardner<sup>1</sup>, Tomas B. Voisin<sup>1</sup>, Jasmine K. Bickel<sup>1,2</sup>, Phillip J. Stansfeld<sup>3</sup>, Edward W. Tate<sup>2</sup>, Doryen Bubeck<sup>1\*</sup>

<sup>1</sup> Department of Life Sciences, Sir Ernst Chain Building, Imperial College London, London SW7 2AZ, United Kingdom

<sup>2</sup> Department of Chemistry, Molecular Sciences Research Hub, Imperial College London, London, W12 0BZ, United Kingdom

<sup>3</sup> School of Life Sciences and Department of Chemistry, Gibbet Hill Campus, The University of Warwick, Coventry, CV4 7AL

\*Correspondence to: [d.bubeck@imperial.ac.uk](mailto:d.bubeck@imperial.ac.uk)

### **Supplementary information**

Supplementary Figs. 1-9

Supplementary Table 1

Supplementary Table 2

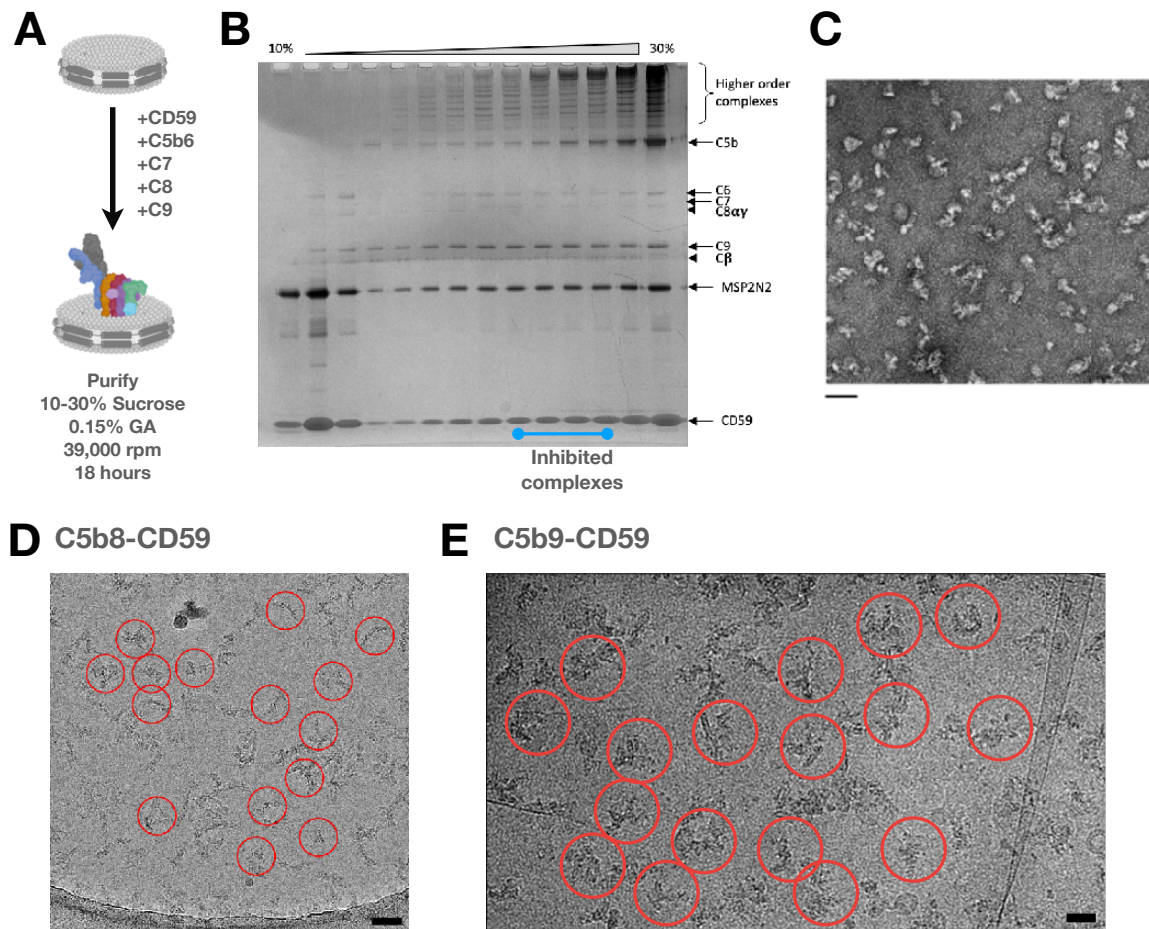

**Supplementary Figure 1.** Supplementary cryoEM data. **(A)** Schematic showing the assembly and purification of CD59-inhibited complement complexes on lipid nanodiscs. Image was created using Biorender (Agreement no: KD24VPIN00) **(B)** Non-reduced SDS-PAGE gel of fractions along the density centrifugation gradient (10-30% sucrose). Sizes corresponding to individual complement proteins, CD59 and MSP2N2 from the nanodisc are indicated. Fractions pooled for further structural analysis are indicated by a blue line. Gel representative of three independent experiments. Uncropped gel can be found in the Source Data file. **(C)** Negatively stained C5b9-CD59 complexes corresponding to pooled fractions in **(B)**. A representative micrograph from 50 randomly imaged locations is shown. Scale bar, 50 nm. **(D)** Representative cryoEM micrograph of C5b8-CD59 sample (selected randomly from 12,805 micrograph movies), individual complexes circled. Scale bar, 40 nm. **(E)** Representative

cryoEM micrograph of C5b9-CD59 sample (selected randomly from 52,838 micrograph movies), individual complexes circled. Scale bar, 20 nm.

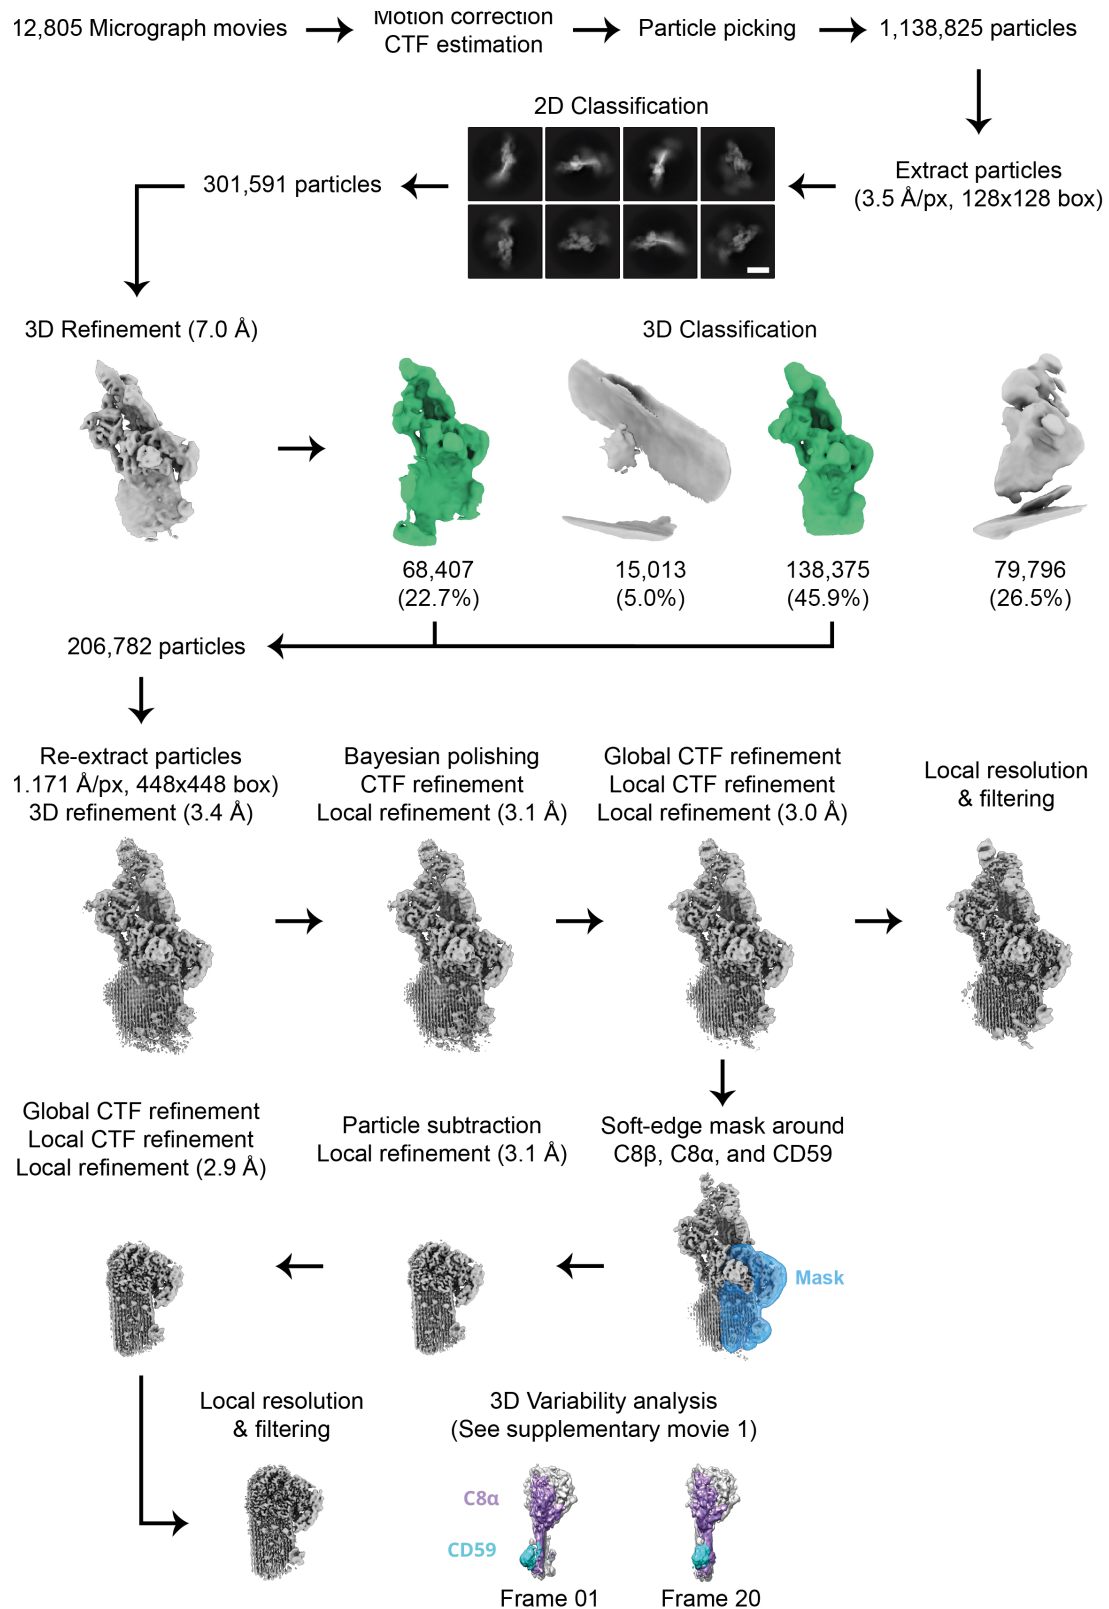

**Supplementary Figure 2.** CryoEM image processing workflow for C5b8-CD59 map. Schematic outlines steps performed to obtain the structure of the C5b8-CD59 complex. Scale bar referring to the 2D class averages is 13 nm. (see Methods for details).

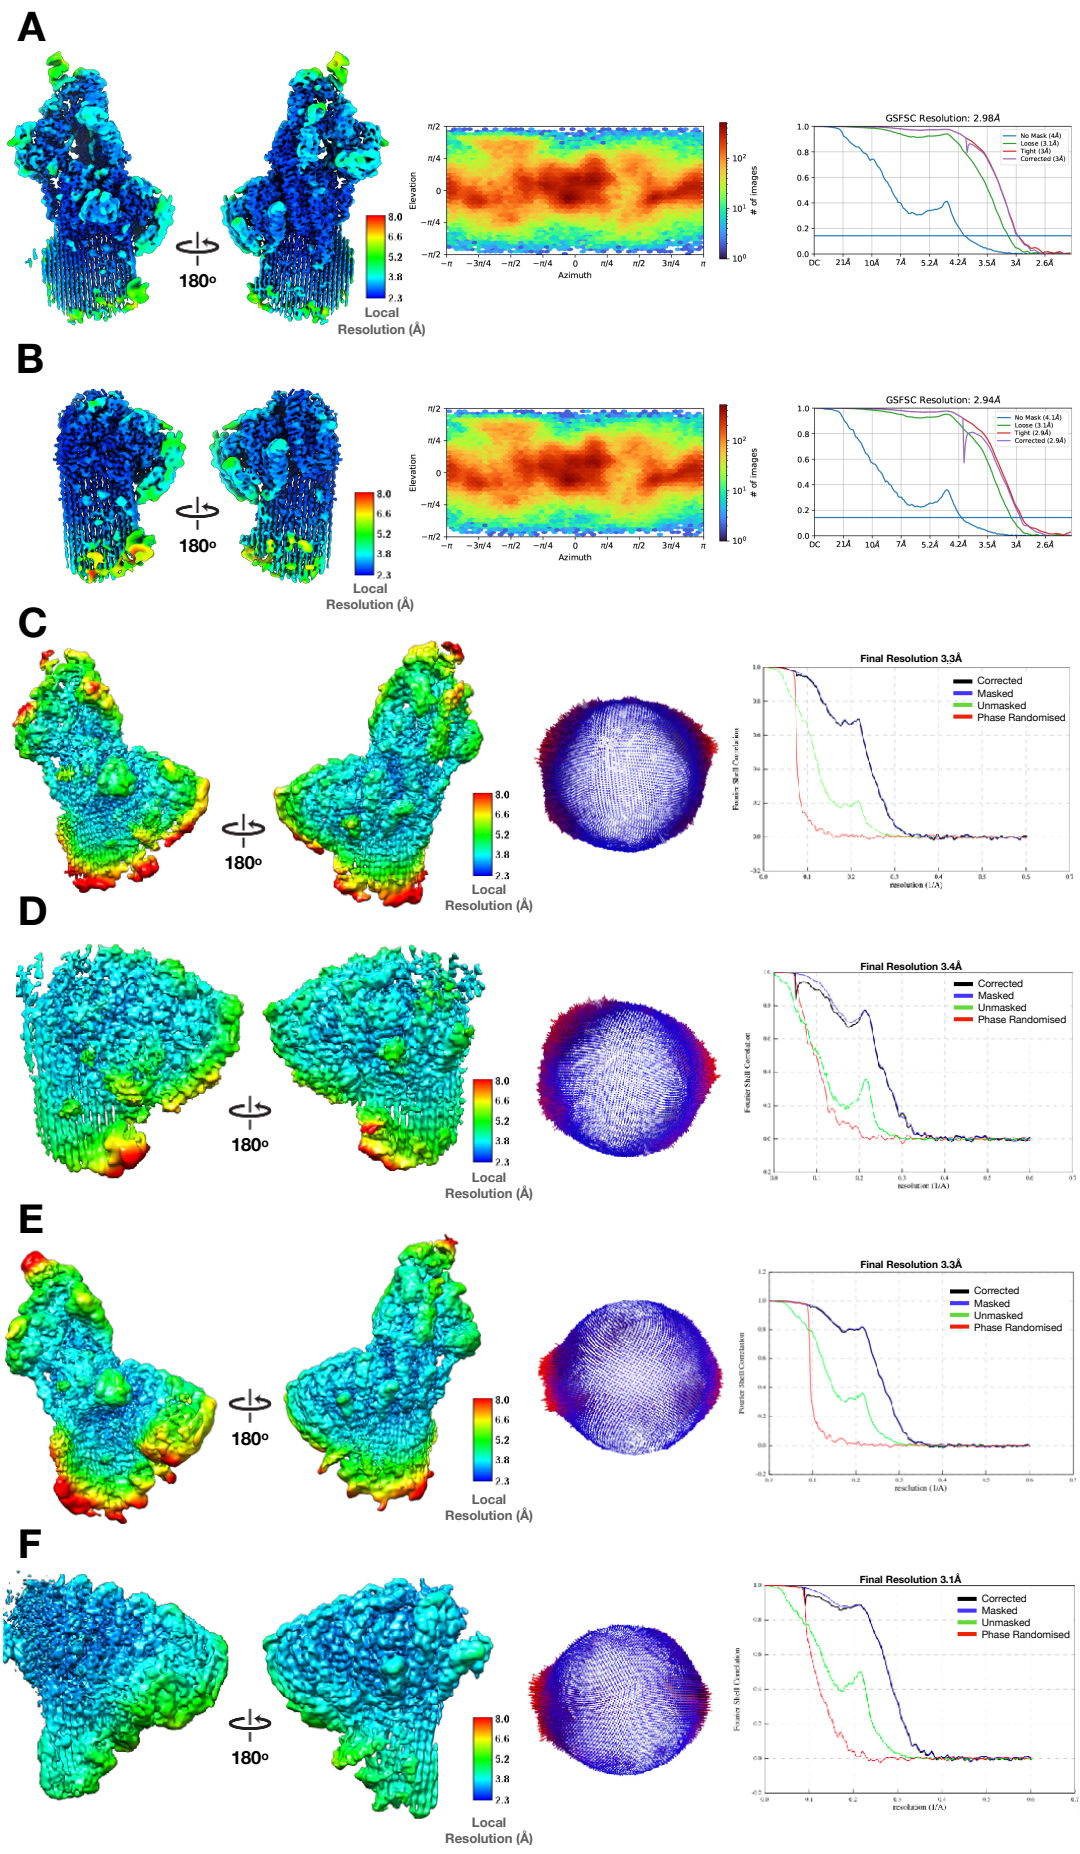

**Supplementary Figure 3.** Map validation information for C5b8-CD59 and C5b9-CD59 complexes. Map validations for C5b8-CD59 (A), density subtracted focus refined C5b8-CD59 (B), C5b9<sub>2</sub>-CD59 (C), density subtracted focus refined C5b9<sub>2</sub>-CD59 (D), C5b9<sub>3</sub>-CD59 (E), density subtracted focus refined C5b9<sub>3</sub>-CD59 (F). Colored local resolution filtered maps for each reconstruction are shown in the left panels. Angular distribution plots for each reconstruction are shown in the middle panels. FSC curves for each reconstruction are shown in the right panels.

**A**

**MSA: CD59**

|                              | 54 |   | 60 |   | 65 |   |   |   |   |   |   |   |   |
|------------------------------|----|---|----|---|----|---|---|---|---|---|---|---|---|
| <i>Homo sapiens</i>          | L  | N | E  | N | E  | L | T | Y | Y | C | C | K | K |
| <i>Gorilla gorilla</i>       | L  | S | E  | S | E  | L | T | Y | H | C | C | K | K |
| <i>Pongo pygmaeus</i>        | L  | N | E  | N | E  | L | T | Y | S | C | C | K | K |
| <i>Sus scrofa</i>            | L  | K | E  | K | K  | L | K | Y | N | C | C | R | K |
| <i>Bos taurus</i>            | L  | K | E  | K | E  | L | H | Y | D | C | C | Q | K |
| <i>Oryctolagus cuniculus</i> | L  | N | E  | N | S  | L | K | Y | N | C | C | R | K |
| <i>Mus musculus</i>          | L  | T | E  | T | K  | L | K | F | R | C | C | Q | F |
| <i>Rattus norvegicus</i>     | L  | A | I  | A | N  | V | Q | Y | R | C | C | Q | A |

**B**

**MSA: C8 $\alpha$**

|                              | 366 |   | 377 |   |   |   |   |   |   |   |   |   |
|------------------------------|-----|---|-----|---|---|---|---|---|---|---|---|---|
| <i>Homo sapiens</i>          | G   | D | H   | C | K | K | F | G | G | G | K | T |
| <i>Gorilla gorilla</i>       | G   | D | H   | C | K | K | F | G | G | G | K | T |
| <i>Pongo pygmaeus</i>        | G   | D | H   | C | K | K | F | G | D | G | K | T |
| <i>Sus scrofa</i>            | G   | K | H   | C | K | K | L | G | G | G | H | R |
| <i>Bos taurus</i>            | L   | G | P   | C | K | K | S | G | D | G | K | L |
| <i>Oryctolagus cuniculus</i> | G   | K | H   | C | K | K | S | G | S | G | D | K |
| <i>Mus musculus</i>          | G   | E | F   | C | E | N | S | G | D | G | D | R |
| <i>Rattus norvegicus</i>     | G   | E | S   | C | V | M | T | G | D | G | N | Q |

**C**

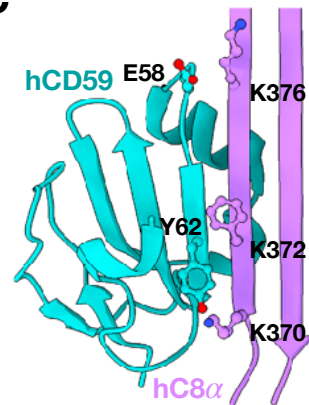

**D**

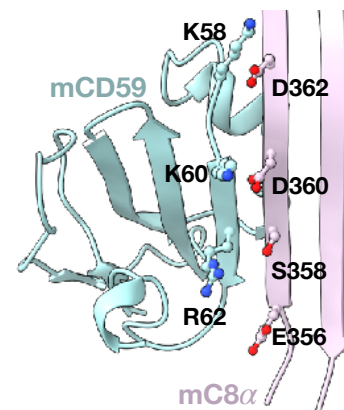

**Supplementary Figure 4.** Co-evolution analysis of the C8 $\alpha$ -CD59 interface. Multisequence alignment (MSA) for CD59 (A) and C8 $\alpha$  residues (B) within the binding interface. Numbering corresponds to the human sequence. (C) Ribbon diagram of the human C8 $\alpha$ -CD59 interface in our structure. (D) Murine model of the interface derived from AlphaFold2 prediction of

CD59 (AlphaFold ID: O55186) and template-based model building of C8 $\alpha$ . Key residues that mediate the interactions are shown as sticks.

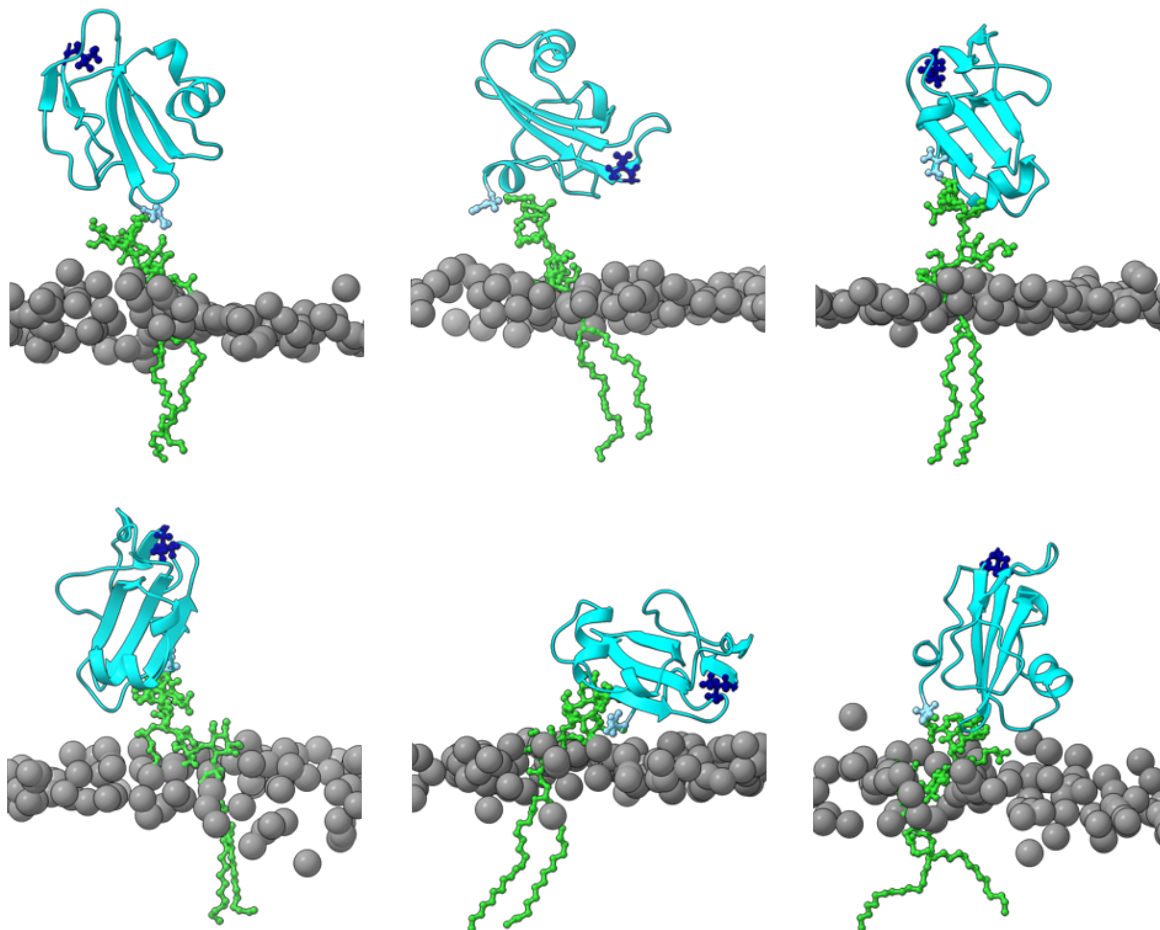

**Supplementary Figure 5.** MD simulations show flexibility of GPI-anchored CD59. Representative frames sampled from the atomistic MD simulations of GPI-anchored CD59 in a DOPC lipid bilayer. CD59 is shown as cyan ribbons with the GPI anchor in green sticks and the N- and C- terminal residues in dark blue and light blue sticks, respectively. Phosphorous atoms from lipid headgroups are grey spheres. Initial and final configurations for the three replicates are supplied as Supplementary Data Files 1-6.

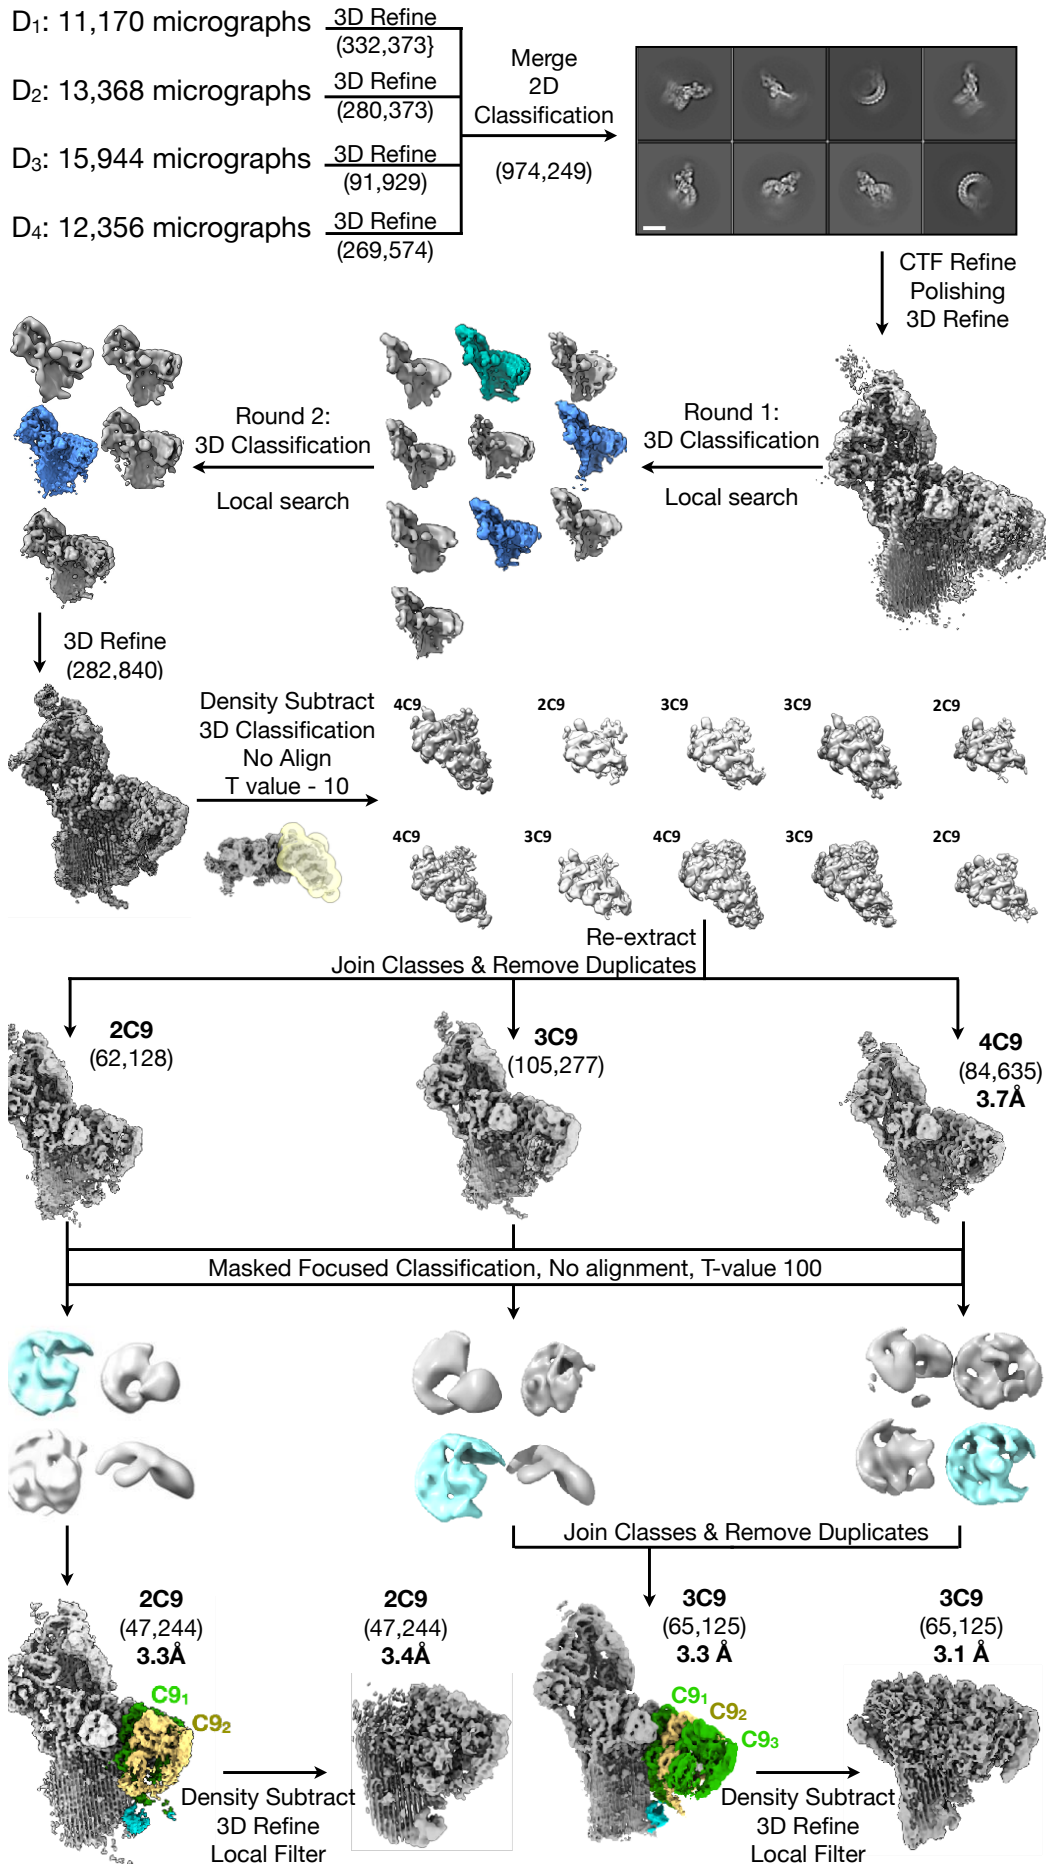



**Supplementary Figure 6.** CryoEM image processing workflow for C5b9-CD59. Schematic outlines steps performed to obtain the C5b9<sub>2</sub>-CD59 and C5b9<sub>3</sub>-CD59 structures. Scale bar referring to the 2D class averages is 20 nm. Particle numbers are in brackets. (see Methods for details).

**A**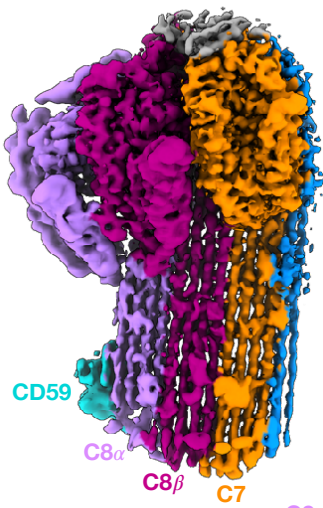**B**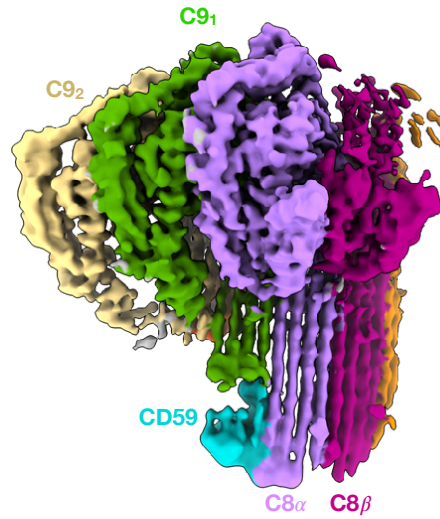**C**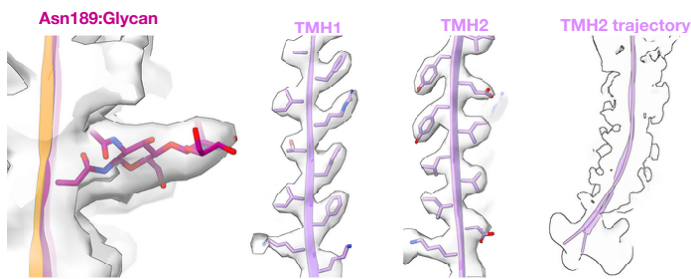**D**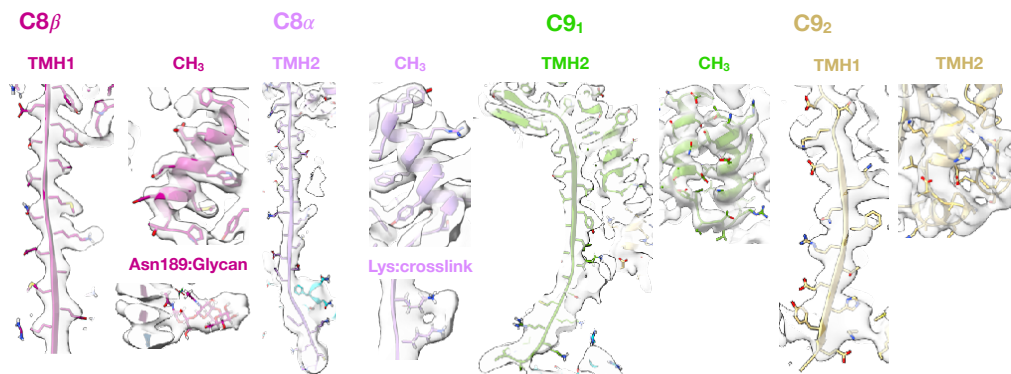**E**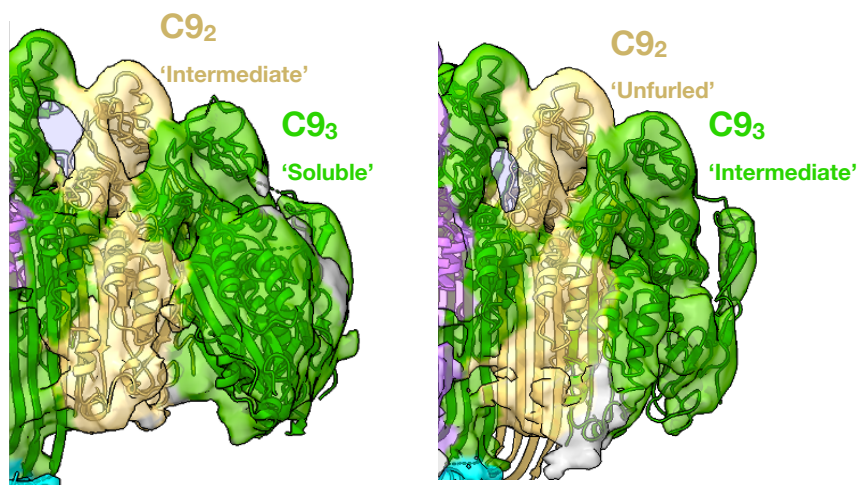

**Supplementary Figure 7.** Map quality of the C5b8-CD59 and C5b9-CD59 structures. **(A-B)** Density subtracted focus refined maps for the C5b8-CD59 **(A)** and C5b9<sub>2</sub>-CD59 **(B)** complexes. **(C-D)** Fits of the C5b8-CD59 **(C)** and C5b9<sub>2</sub>-CD59 **(D)** models into their respective density subtracted maps. **(E)** Models for two conformations of the terminal C9 (C9<sub>3</sub>) derived from the cryoDRGN analysis of the C5b9-CD59 complex.

**A** Complement activation,  
SNAP-CD59-488

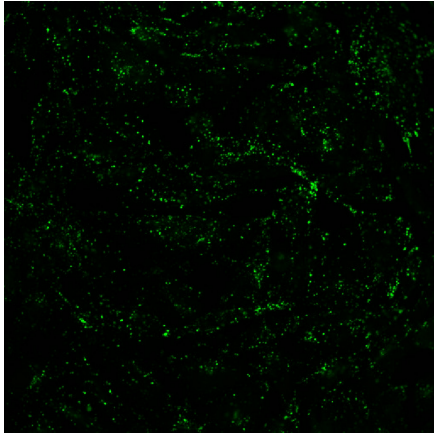

**B** + 10mM MBCD, Complement activation,  
SNAP-CD59-488

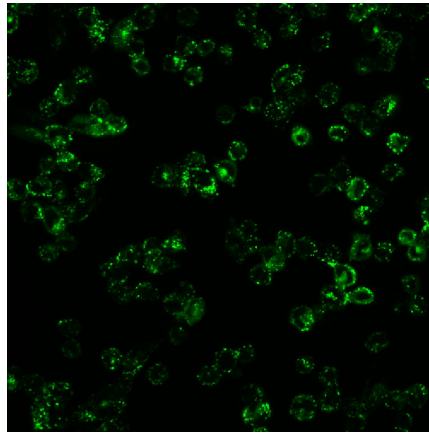

**C** + C9 depleted serum,  
C9-568

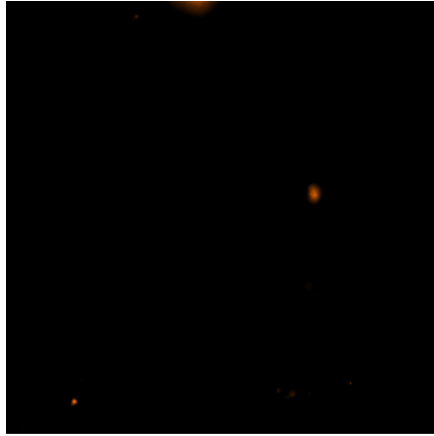

**D** + C9-568

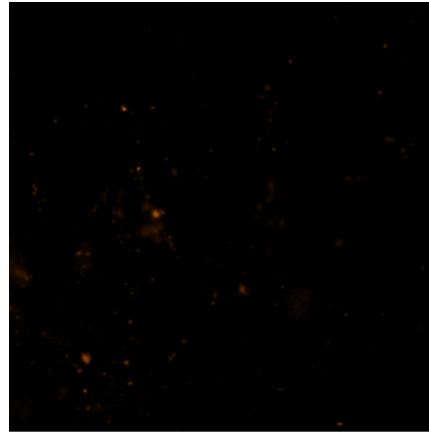

**E**

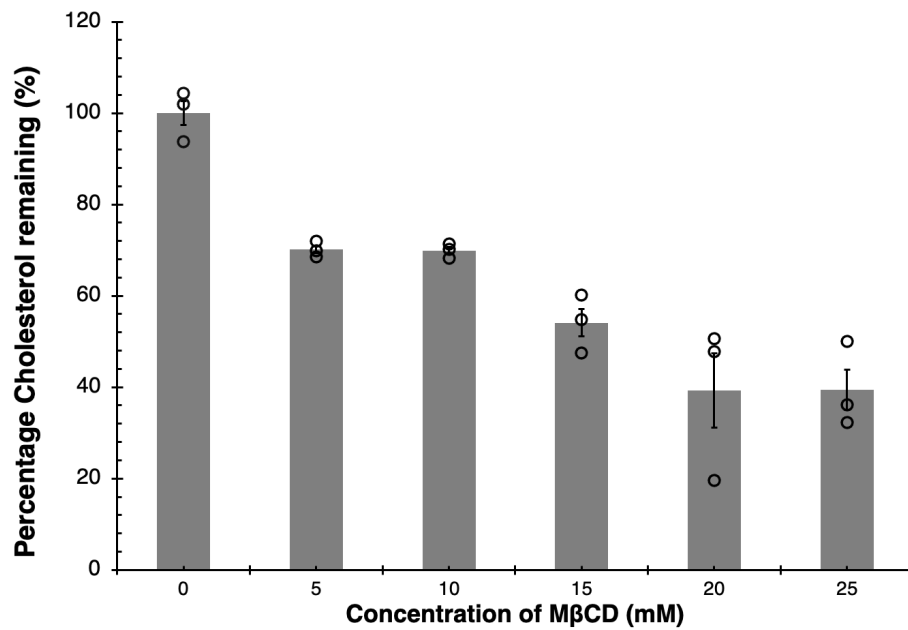

**Supplementary Figure 8.** Supporting cellular assay controls. (A-B) CHO cells expressing SNAP-CD59 were treated with a polyclonal anti-CHO IgG antibody to activate complement. Cells were incubated with C9-depleted human serum supplemented with a chemically-labeled fluorescent C9 (C9-Alexafluor 568) capable of forming MAC. CD59 was visualized with SNAP-Oregon (488 nm) in control cells (A) and in cells treated with M $\beta$ CD to deplete cholesterol (B). Wide-field fluorescence microscopy was used to visualize C9 on the cell surface in the absence of complement activator (C) and when incubated with C9-Alexafluor 568 alone (D). No nonspecific binding is observed. Representative images (out of 10 randomly selected locations) for condition are shown. Scale bars, 50  $\mu$ m. (E) Amplex-Red cholesterol depletion assay detecting the extent of cholesterol present in the cells normalized to untreated cells. Individual measurements are given as points, the average and standard deviation across three technical replicates are shown. Data underlying (E) is found in the Source Data File.

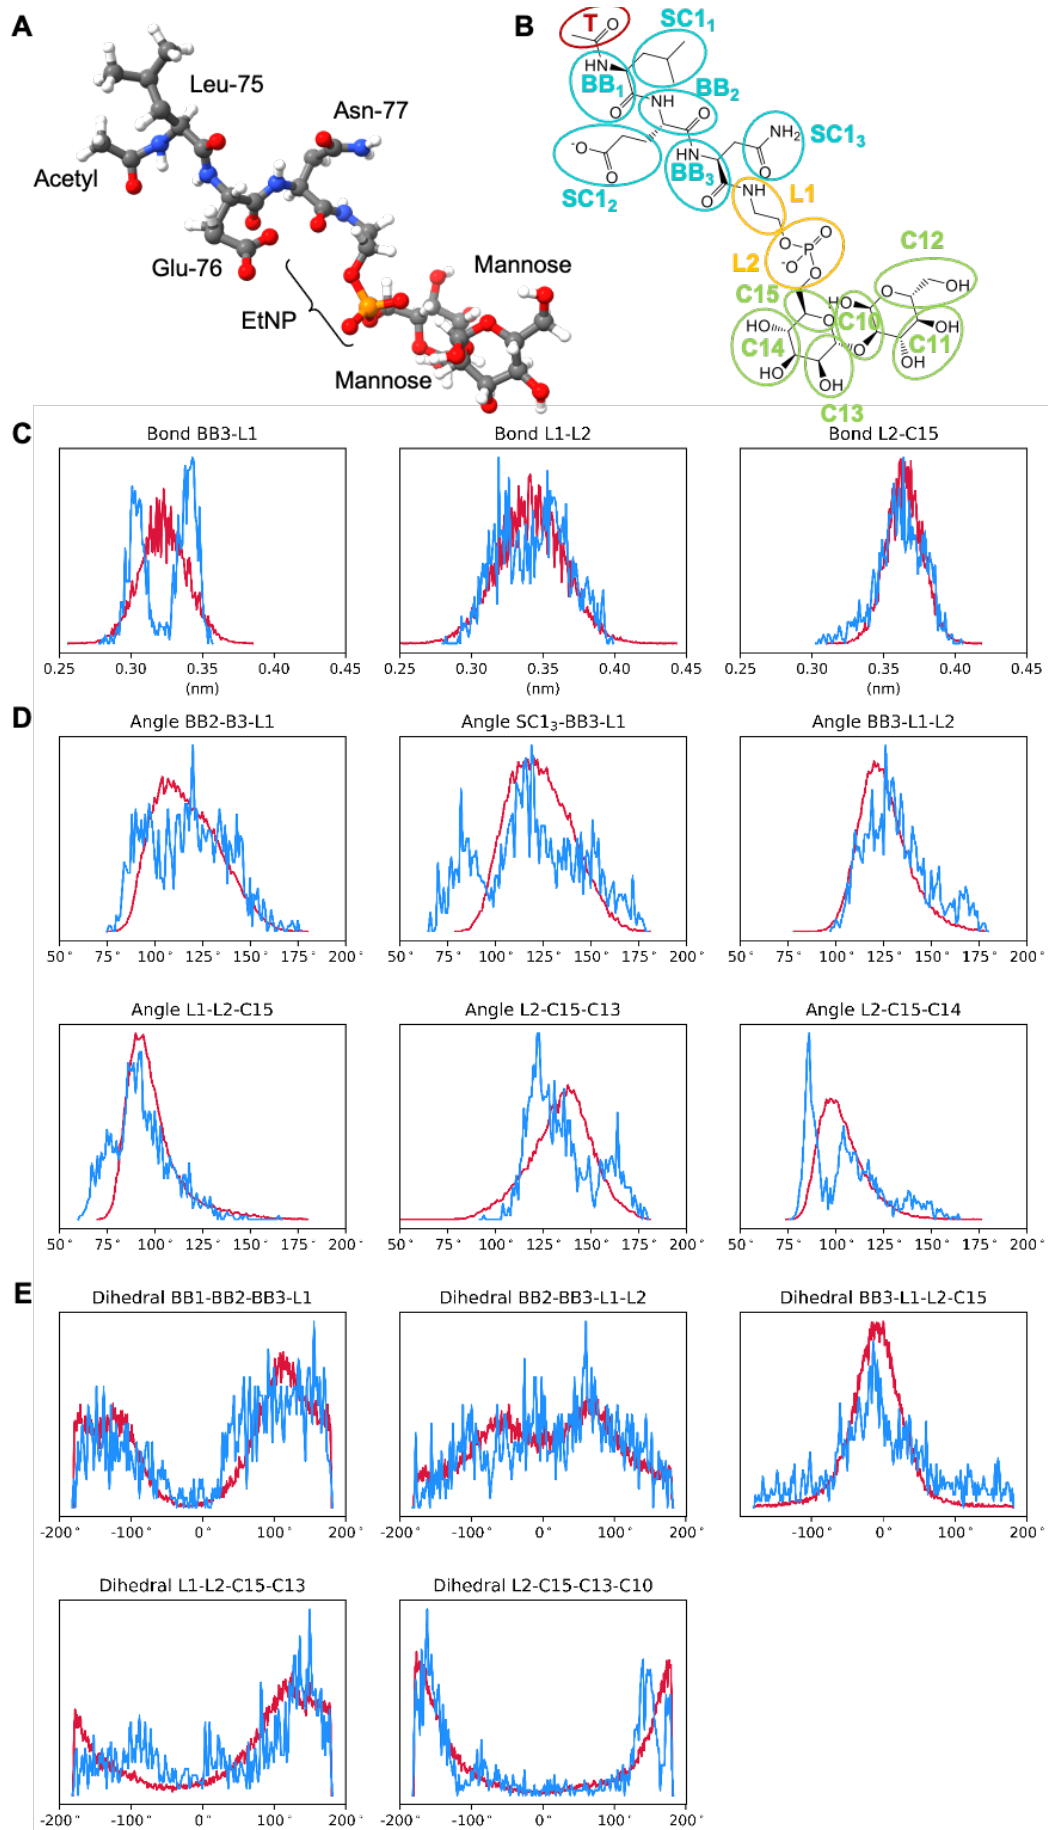

**Supplementary Figure 9.** Parameterization of the phosphoethanolamine linker (EtNP). **(A)** Stick representation of the molecule used for parameterization. **(B)** Coarse-grained mapping of the molecule in (A). Beads corresponding to the CD59 residues are in cyan, the terminal acetyl cap is red, beads for the EtNP linker (L1 and L2) are in yellow, and beads corresponding to the mannose residues are in green. Comparing bond lengths **(C)** angles **(D)** and dihedral angles **(E)** involving beads L1 and L2 of the EtNP linker between atomistic (blue) and coarse-grained (red) simulations.

**Supplementary Table 1.** Validation statistics for EM maps and models.

|                                                        | <b>#1 C5b8-<br/>CD59</b><br>EMD: 15779 | <b>#2 C5b8-CD59<sup>arc</sup></b><br>EMD: 15800 | <b>#3 C5b9<sub>2</sub>-<br/>CD59</b><br>EMD: 15781                                                           | <b>#4 C5b9<sub>3</sub>-<br/>CD59</b><br>EMD: 15780                                                           | <b>#5 C5b9<sub>2</sub>-<br/>CD59<sup>arc</sup></b><br>EMD: 15782                                             | <b>#6 C5b9<sub>3</sub>-<br/>CD59<sup>arc</sup></b><br>EMD: 15783                                             |
|--------------------------------------------------------|----------------------------------------|-------------------------------------------------|--------------------------------------------------------------------------------------------------------------|--------------------------------------------------------------------------------------------------------------|--------------------------------------------------------------------------------------------------------------|--------------------------------------------------------------------------------------------------------------|
| <b>Data collection and processing</b>                  |                                        |                                                 |                                                                                                              |                                                                                                              |                                                                                                              |                                                                                                              |
| <b>Magnification</b>                                   | 105k                                   | 105k                                            | 105k                                                                                                         | 105k                                                                                                         | 105k                                                                                                         | 105k                                                                                                         |
| <b>Voltage (kV)</b>                                    | 300                                    | 300                                             | 300                                                                                                          | 300                                                                                                          | 300                                                                                                          | 300                                                                                                          |
| <b>Electron exposure (e<sup>-</sup>/Å<sup>2</sup>)</b> | 50                                     | 50                                              | D <sub>1</sub> :43<br>D <sub>2</sub> :56<br>D <sub>3</sub> :40<br>D <sub>4</sub> :50                         | D <sub>1</sub> :43<br>D <sub>2</sub> :56<br>D <sub>3</sub> :40<br>D <sub>4</sub> :50                         | D <sub>1</sub> :43<br>D <sub>2</sub> :56<br>D <sub>3</sub> :40<br>D <sub>4</sub> :50                         | D <sub>1</sub> :43<br>D <sub>2</sub> :56<br>D <sub>3</sub> :40<br>D <sub>4</sub> :50                         |
| <b>Defocus range (μm)</b>                              | -1.0 to -2.25                          | -1.0 to -2.25                                   | -1.0 to -2.25                                                                                                | -1.0 to -2.25                                                                                                | -1.0 to -2.25                                                                                                | -1.0 to -2.25                                                                                                |
| <b>Detector Type</b>                                   | Falcon IV                              |                                                 | K3                                                                                                           | K3                                                                                                           | K3                                                                                                           | K3                                                                                                           |
| <b>Pixel size (Å)</b>                                  | 1.171                                  | 1.171                                           | D <sub>1</sub> :0.829<br>D <sub>2</sub> :0.831<br>D <sub>3</sub> :0.831<br>D <sub>4</sub> :0.85              | D <sub>1</sub> :0.829<br>D <sub>2</sub> :0.831<br>D <sub>3</sub> :0.831<br>D <sub>4</sub> :0.85              | D <sub>1</sub> :0.829<br>D <sub>2</sub> :0.831<br>D <sub>3</sub> :0.831<br>D <sub>4</sub> :0.85              | D <sub>1</sub> :0.829<br>D <sub>2</sub> :0.831<br>D <sub>3</sub> :0.831<br>D <sub>4</sub> :0.85              |
| <b>Symmetry imposed</b>                                | C1                                     | C1                                              | C1                                                                                                           | C1                                                                                                           | C1                                                                                                           | C1                                                                                                           |
| <b>Initial particle images (no.)</b>                   | 1,138,825                              | 1,138,825                                       | D <sub>1</sub> :737,138<br>D <sub>2</sub> :1,058,026<br>D <sub>3</sub> :1,330,232<br>D <sub>4</sub> :722,870 | D <sub>1</sub> :737,138<br>D <sub>2</sub> :1,058,026<br>D <sub>3</sub> :1,330,232<br>D <sub>4</sub> :722,870 | D <sub>1</sub> :737,138<br>D <sub>2</sub> :1,058,026<br>D <sub>3</sub> :1,330,232<br>D <sub>4</sub> :722,870 | D <sub>1</sub> :737,138<br>D <sub>2</sub> :1,058,026<br>D <sub>3</sub> :1,330,232<br>D <sub>4</sub> :722,870 |
| <b>Particle images before merging (no.)</b>            | N/A                                    | N/A                                             | D <sub>1</sub> :332,373<br>D <sub>2</sub> :280,769<br>D <sub>3</sub> :91,929<br>D <sub>4</sub> :269,574      | D <sub>1</sub> :332,373<br>D <sub>2</sub> :280,769<br>D <sub>3</sub> :91,929<br>D <sub>4</sub> :269,574      | D <sub>1</sub> :332,373<br>D <sub>2</sub> :280,769<br>D <sub>3</sub> :91,929<br>D <sub>4</sub> :269,574      | D <sub>1</sub> :332,373<br>D <sub>2</sub> :280,769<br>D <sub>3</sub> :91,929<br>D <sub>4</sub> :269,574      |
| <b>Final particle images (no.)</b>                     | 206,782                                | 206,782                                         | 47,244                                                                                                       | 33,138                                                                                                       | 47,244                                                                                                       | 33,138                                                                                                       |
| <b>Map resolution (Å)</b><br>FSC threshold 0.143       | 3.0                                    | 2.9                                             | 3.3                                                                                                          | 3.3                                                                                                          | 3.5                                                                                                          | 3.2                                                                                                          |
| <b>Map resolution range (Å)</b>                        | 2.3-8.0                                | 2.3-8.0                                         | 3.0-12.4                                                                                                     | 3.0-10.2                                                                                                     | 3.1-11.0                                                                                                     | 3.0-8.0                                                                                                      |
| <b>Refinement</b>                                      |                                        |                                                 |                                                                                                              |                                                                                                              |                                                                                                              |                                                                                                              |
| <b>Initial model used (PDB code)</b>                   | 7NYD, 2J8B                             | 7NYD,2J8B                                       | 7NYD, 2J8B                                                                                                   | 7NYD, 2J8B                                                                                                   | 7NYD, 2J8B                                                                                                   | 7NYD, 2J8B                                                                                                   |
| <b>Model resolution (Å)</b><br>FSC threshold 0.5       | 3.0                                    |                                                 | 3.3                                                                                                          | 3.2                                                                                                          |                                                                                                              |                                                                                                              |
| <b>Map sharpening</b><br>B factor (Å <sup>2</sup> )    | -60                                    | -60                                             | -50                                                                                                          | -50                                                                                                          | -50                                                                                                          | -50                                                                                                          |
| <b>Model composition</b>                               |                                        |                                                 |                                                                                                              |                                                                                                              |                                                                                                              |                                                                                                              |
| Non-hydrogen atoms                                     | 30,943                                 |                                                 | 37,288                                                                                                       | 40,505                                                                                                       |                                                                                                              |                                                                                                              |
| Protein residues                                       | 3910                                   |                                                 | 4704                                                                                                         | 5113                                                                                                         |                                                                                                              |                                                                                                              |
| Ligands                                                | BMA: 1                                 |                                                 | BMA: 4                                                                                                       | BMA: 0                                                                                                       |                                                                                                              |                                                                                                              |
| Ions                                                   | NAG: 6<br>Ca: 2                        |                                                 | NAG: 8<br>0                                                                                                  | NAG: 10<br>0                                                                                                 |                                                                                                              |                                                                                                              |
| <b>B factors (Å<sup>2</sup>)</b>                       |                                        |                                                 |                                                                                                              |                                                                                                              |                                                                                                              |                                                                                                              |
| <b>Protein</b>                                         | 86.80                                  |                                                 | 117.93                                                                                                       | 118.03                                                                                                       |                                                                                                              |                                                                                                              |
| <b>Ligand</b>                                          | 136.15                                 |                                                 | 187.03                                                                                                       | 138.05                                                                                                       |                                                                                                              |                                                                                                              |
| <b>R.m.s. deviations</b>                               |                                        |                                                 |                                                                                                              |                                                                                                              |                                                                                                              |                                                                                                              |
| Bond lengths (Å)                                       | 0.003                                  |                                                 | 0.001                                                                                                        | 0.009                                                                                                        |                                                                                                              |                                                                                                              |
| Bond angles (°)                                        | 0.739                                  |                                                 | 0.867                                                                                                        | 0.791                                                                                                        |                                                                                                              |                                                                                                              |
| <b>Validation</b>                                      |                                        |                                                 |                                                                                                              |                                                                                                              |                                                                                                              |                                                                                                              |
| MolProbity score                                       | 1.81                                   |                                                 | 1.87                                                                                                         | 1.66                                                                                                         |                                                                                                              |                                                                                                              |
| Clashscore                                             | 4.43                                   |                                                 | 8.53                                                                                                         | 5.49                                                                                                         |                                                                                                              |                                                                                                              |
| Poor rotamers (%)                                      | 1.4                                    |                                                 | 0.56                                                                                                         | 0.31                                                                                                         |                                                                                                              |                                                                                                              |
| <b>Ramachandran plot</b>                               |                                        |                                                 |                                                                                                              |                                                                                                              |                                                                                                              |                                                                                                              |
| Favored (%)                                            | 92.24                                  |                                                 | 95.87                                                                                                        | 94.80                                                                                                        |                                                                                                              |                                                                                                              |
| Allowed (%)                                            | 7.76                                   |                                                 | 5.13                                                                                                         | 5.20                                                                                                         |                                                                                                              |                                                                                                              |
| Disallowed (%)                                         | 0.0                                    |                                                 | 0.0                                                                                                          | 0.0                                                                                                          |                                                                                                              |                                                                                                              |



**Supplementary Table 2.** CG parameters of the molecules used for parametrization of the EtNP linker.

| Bead name                                                | Bead type | Bond                               | $r_0$ (nm) | $K_b$ (kJ/mol) | Angle                                                | $\theta_0$ (°) | $K_a$ (kJ/mol) |
|----------------------------------------------------------|-----------|------------------------------------|------------|----------------|------------------------------------------------------|----------------|----------------|
| T                                                        | SN0       | T – BB <sub>1</sub>                | 0.3        | 20000          | T – BB <sub>1</sub> – BB <sub>2</sub>                | 128            | 20.0           |
| BB <sub>1</sub>                                          | P5        | BB <sub>1</sub> – SC <sub>11</sub> | 0.33       | 7500           | T – BB <sub>1</sub> – SC <sub>11</sub>               | 108            | 30.0           |
| SC <sub>11</sub>                                         | C1        | BB <sub>1</sub> – BB <sub>2</sub>  | 0.39       | 20000          | BB <sub>1</sub> – BB <sub>2</sub> – BB <sub>3</sub>  | 132            | 30.0           |
| BB <sub>2</sub>                                          | P5        | BB <sub>2</sub> – SC <sub>12</sub> | 0.4        | 5000           | SC <sub>12</sub> – BB <sub>2</sub> – BB <sub>3</sub> | 108            | 30.0           |
| SC <sub>12</sub>                                         | Qa        | BB <sub>2</sub> – BB <sub>3</sub>  | 0.35       | 20000          | BB <sub>2</sub> – BB <sub>3</sub> – SC <sub>13</sub> | 96             | 80.0           |
| BB <sub>3</sub>                                          | P5        | BB <sub>3</sub> – SC <sub>13</sub> | 0.32       | 5000           | BB <sub>2</sub> – BB <sub>3</sub> – L1               | 105            | 2.5            |
| SC <sub>13</sub>                                         | P5        | BB <sub>3</sub> – L1               | 0.33       | 10000          | SC <sub>13</sub> – BB <sub>3</sub> – L1              | 90             | 1.0            |
| L1                                                       | GSNda     | L1 – L2                            | 0.35       | 5000           | BB <sub>3</sub> – L1 – L2                            | 130            | 60.0           |
| L2                                                       | GQa       | L2 – C15                           | 0.365      | 18000          | L1 – L2 – C15                                        | 45             | 5.0            |
| C15                                                      | GNa       | C15 – C14                          | 0.33       | 20000          | L2 – C15 – C13                                       | 180            | 15.0           |
| C14                                                      | GP3       | C15 – C13                          | 0.35       | 20000          | L2 – C15 – C14                                       | 70             | 20.0           |
| C13                                                      | GSP1      | C14 – C13                          | 0.28       | 40000          | C15 – C13 – C10                                      | 65             | 45.0           |
| C12                                                      | GP2       | C13 – C10                          | 0.36       | 20000          | C14 – C13 – C10                                      | 95             | 100.0          |
| C11                                                      | GP3       | C12 – C11                          | 0.33       | 30000          |                                                      |                |                |
| C10                                                      | GSN0      | C12 – C10                          | 0.35       | 30000          |                                                      |                |                |
|                                                          |           | C11 – C10                          | 0.28       | 40000          |                                                      |                |                |
| Dihedral                                                 |           |                                    | Type       |                | $\phi_0$ (°)                                         | $K_d$ (kJ/mol) |                |
| BB <sub>2</sub> – BB <sub>3</sub> – L1 – L2              |           |                                    | Proper     |                | 220                                                  | 1.5            |                |
| BB <sub>3</sub> – L1 – L2 – C15                          |           |                                    | Proper     |                | –195                                                 | 4.0            |                |
| L1 – L2 – C15 – C13                                      |           |                                    | Proper     |                | 320                                                  | 3.5            |                |
| L2 – C15 – C13 – C10                                     |           |                                    | Proper     |                | 30                                                   | 3.0            |                |
| BB <sub>1</sub> – BB <sub>2</sub> – BB <sub>3</sub> – L1 |           |                                    | Improper   |                | –200                                                 | 3.0            |                |
