# Supplementary material for: Structural basis for membrane attack complex inhibition by CD59
Source: PubMed Central journal article supplement (PMC9935631; doi:10.1038/s41467-023-36441-z), 2023-02-16
Supplement: 41467_2023_36441_MOESM3_ESM.pdf [file 41467_2023_36441_MOESM3_ESM.pdf]

## **Description of Additional Supplementary Files**

**Supplementary Movie 1:** 3D variability analysis of the focus refined C5b8-CD59 map. A linear movie of volumes visualizing variability across the first principal component is shown. Volumes are coloured according to protein components: CD59 is cyan, C8a is pink, all other proteins in the map are grey

### **Supplementary Data File Legends:**

**Supplementary Data File 1:** The initial configuration from the atomistic CD59 production run in Gromacs format (first replicate).

**Supplementary Data File 2:** The final configuration from the atomistic CD59 production run in Gromacs format (first replicate).

**Supplementary Data File 3:** The initial configuration from the atomistic CD59 production run in Gromacs format (second replicate).

**Supplementary Data File 4:** The final configuration from the atomistic CD59 production run in Gromacs format (second replicate).

**Supplementary Data File 5:** The initial configuration from the atomistic CD59 production run in Gromacs format (third replicate).

**Supplementary Data File 6:** The final configuration from the atomistic CD59 production run in Gromacs format (third replicate).

**Supplementary Data File 7:** Initial configuration from the coarse-grain CD59-C5b8 production run in Gromacs format (first replicate).

**Supplementary Data File 8:** Final configuration from the coarse-grain CD59-C5b8 production run in Gromacs (first replicate).

**Supplementary Data File 9:** Initial configuration from the coarse-grain CD59-C5b8 production run in Gromacs format (second replicate).

**Supplementary Data File 10:** Final configuration from the coarse-grain CD59-C5b8 production run in Gromacs (second replicate).

**Supplementary Data File 11:** Initial configuration from the coarse-grain CD59-C5b8 production run in Gromacs format (third replicate).

**Supplementary Data File 12:** Final configuration from the coarse-grain CD59-C5b8 production run in Gromacs (third replicate).
